# Supplementary material for: Analysis of Lenvatinib’s Efficacy against Intermediate-Stage Unresectable Hepatocellular Carcinoma
Source: MDPI journal article supplement (doi:10.3390/cancers14205066), 2022-10-16
Supplement: s1 [file s1]

# Supplementary Material: Analysis of Lenvatinib's Efficacy against Intermediate-Stage Unresectable Hepatocellular Carcinoma

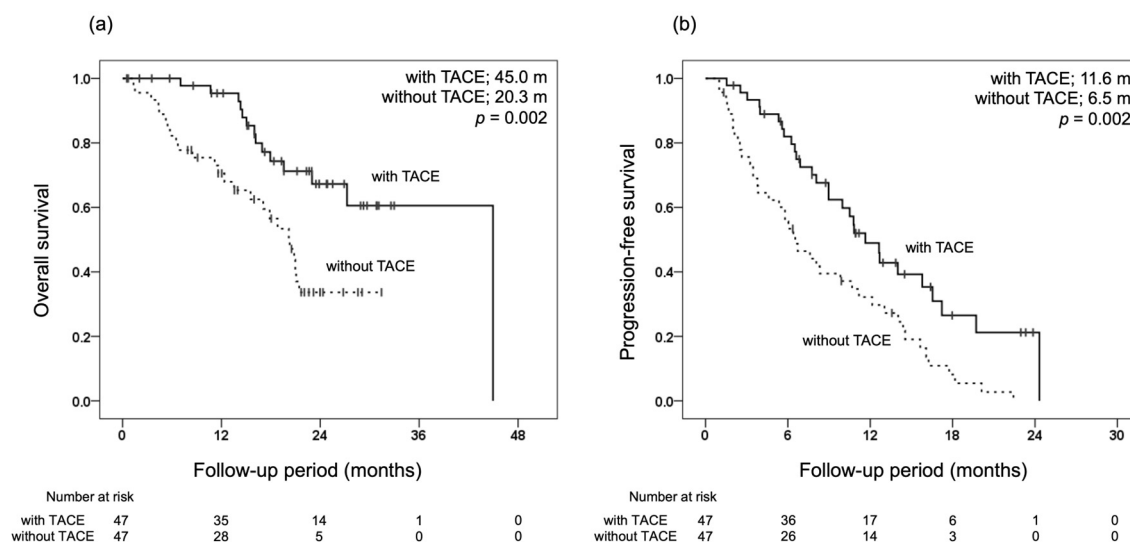

**Figure S1.** Comparison of overall survival (OS) and progression-free survival (PFS) between groups with and without transarterial chemoembolization (TACE) after propensity score matching. (a) OS in the group with and without TACE (with TACE 45.0 months, without TACE 20.3 months,  $p = 0.002$ ). (b) PFS in the group with and without TACE (with TACE 11.6 months, without TACE 6.5 months,  $p = 0.002$ ).

**Table S1.** Clinical characteristics at the initiation of lenvatinib (before propensity score matching).

| Characteristic                                                   | With TACE $n = 51$ | Without TACE $n = 89$ | $p$ -Value |
|------------------------------------------------------------------|--------------------|-----------------------|------------|
| Age, range, y                                                    | 72 (46–90)         | 77 (48–89)            | 0.010      |
| Sex (male/female), n                                             | 48/3               | 75/14                 | 0.086      |
| Weight (< 60/≥ 60 kg), n                                         | 19/32              | 39/50                 | 0.448      |
| Performance status (0/1), n                                      | 48/3               | 80/9                  | 0.536      |
| Etiology (viral /non-viral), n                                   | 22/29              | 42/47                 | 0.643      |
| Total bilirubin, range, mg/dL                                    | 0.7 (0.3–1.7)      | 0.7 (0.3–2.4)         | 0.730      |
| Albumin, range, g/dL                                             | 3.8 (3.1–4.8)      | 3.7 (2.7–4.6)         | 0.207      |
| Prothrombin activity, range, %                                   | 92 (61–126)        | 88 (59–129)           | 0.330      |
| Child–Pugh score (5–6/7), n                                      | 47/4               | 84/5                  | 0.724      |
| mALBI grade (1–2a/2b), n                                         | 37/14              | 55/34                 | 0.197      |
| Size of main tumor, range, mm                                    | 33.0 (10.0–120.0)  | 23.0 (8.0–130.0)      | 0.047      |
| Number of tumors (2–3/> 4), n                                    | 12/39              | 27/62                 | 0.387      |
| Relative tumor volume (< 50/≥ 50%), n                            | 47/4               | 84/5                  | 0.724      |
| Tumor morphology (SN type/non-SN type), n                        | 20/31              | 36/53                 | 0.886      |
| Serum AFP value, range, ng/mL                                    | 12.2 (1.4–56744.0) | 17.2 (0.9–84001.6)    | 0.697      |
| Serum DCP value, range, mAU/mL                                   | 241 (13–93112)     | 151 (14–75549)        | 0.534      |
| Up to 7 criteria (in/out), n                                     | 13/38              | 35/54                 | 0.097      |
| History of systemic treatment (with/without), n                  | 5/46               | 17/72                 | 0.146      |
| Number of previous TACE procedure before lenvatinib (0–2/< 3), n | 31/20              | 46/43                 | 0.298      |
| TACE-refractory or unsuitable (with/without), n                  | 50/1               | 83/6                  | 0.422      |

mALBI, modified albumin-bilirubin; SN, simple nodular; AFP, alpha-fetoprotein; DCP, des-γ-carboxy prothrombin; TACE, transarterial chemoembolization.

**Table S2.** Clinical characteristics at the initiation of lenvatinib (after propensity score matching).

| Characteristic                                                           | With TACE <i>n</i> = 47 | Without TACE <i>n</i> = 47 | <i>p</i> -Value |
|--------------------------------------------------------------------------|-------------------------|----------------------------|-----------------|
| Age, range, y                                                            | 73 (54–90)              | 75 (57–89)                 | 0.751           |
| Sex (male/female), <i>n</i>                                              | 44/3                    | 43/4                       | 1.000           |
| Weight (< 60/ ≥ 60 kg), <i>n</i>                                         | 18/29                   | 16/31                      | 0.668           |
| Performance status (0/1), <i>n</i>                                       | 44/3                    | 42/5                       | 0.714           |
| Etiology (viral /non-viral), <i>n</i>                                    | 21/26                   | 22/25                      | 0.836           |
| Total bilirubin, range, mg/dL                                            | 0.7 (0.3–1.7)           | 0.8 (0.4–2.4)              | 0.298           |
| Albumin, range, g/dL                                                     | 3.8 (3.1–4.7)           | 3.7 (2.7–4.6)              | 0.345           |
| Prothrombin activity, range, %                                           | 92 (61–114)             | 88 (65–129)                | 0.997           |
| Child–Pugh score (5–6/7), <i>n</i>                                       | 43/4                    | 44/3                       | 1.000           |
| mALBI grade (1–2a/2b), <i>n</i>                                          | 33/14                   | 28/19                      | 0.280           |
| Size of main tumor, range, mm                                            | 33.0 (10.0–120.0)       | 28.0 (10.0–130.0)          | 0.517           |
| Number of tumors (2–3/ > 4), <i>n</i>                                    | 12/35                   | 10/37                      | 0.626           |
| Relative tumor volume (< 50/ ≥ 50%), <i>n</i>                            | 43/4                    | 42/5                       | 1.000           |
| Tumor morphology (SN type/non-SN type), <i>n</i>                         | 19/28                   | 16/31                      | 0.522           |
| Serum AFP value, range, ng/mL                                            | 17.0 (1.4–56744.0)      | 12.2 (2.0–28047.0)         | 0.809           |
| Serum DCP value, range, mAU/mL                                           | 241 (13–93112)          | 138 (14–60331)             | 0.615           |
| Up to 7 criteria (in/out), <i>n</i>                                      | 12/35                   | 11/36                      | 0.810           |
| History of systemic treatment (with/without), <i>n</i>                   | 5/42                    | 9/38                       | 0.247           |
| Number of previous TACE procedure before lenvatinib (0–2/ < 3), <i>n</i> | 29/18                   | 26/21                      | 0.530           |
| TACE-refractory or unsuitable (with/without), <i>n</i>                   | 46/1                    | 45/2                       | 1.000           |

mALBI, modified albumin-bilirubin; SN, simple nodular; AFP, alpha-fetoprotein; DCP, des-γ-carboxy prothrombin; TACE, transarterial chemoembolization.

**Table S3.** Comparison of clinical characteristics of patients who received conversion therapy and those who did not.

| Characteristic                                                           | conversion not performed <i>n</i> = 131 | conversion performed <i>n</i> = 9 | Univariate <i>p</i> -Value | Multivariate <i>p</i> -Value |
|--------------------------------------------------------------------------|-----------------------------------------|-----------------------------------|----------------------------|------------------------------|
| Age, range, y                                                            | 75 (46–90)                              | 76 (61–88)                        | 0.444                      |                              |
| Sex (male/female), <i>n</i>                                              | 115/16                                  | 8/1                               | 0.922                      |                              |
| Weight (< 60/ ≥ 60 kg), <i>n</i>                                         | 52/79                                   | 6/3                               | 0.112                      |                              |
| Performance status (0/1), <i>n</i>                                       | 48/3                                    | 9/0                               | 0.342                      |                              |
| Etiology (viral /non-viral), <i>n</i>                                    | 62/69                                   | 2/7                               | 0.144                      |                              |
| Total bilirubin, range, mg/dL                                            | 0.7 (0.3–2.4)                           | 0.7 (0.4–1.0)                     | 0.234                      |                              |
| Albumin, range, g/dL                                                     | 3.8 (2.7–4.8)                           | 4.1 (3.5–4.6)                     | 0.046                      | 0.068                        |
| Prothrombin activity, range, %                                           | 90 (59–129)                             | 93 (82–102)                       | 0.277                      |                              |
| Child–Pugh score (5–6/7), <i>n</i>                                       | 122/9                                   | 9/0                               | 0.416                      |                              |
| mALBI grade (1–2a/2b), <i>n</i>                                          | 84/47                                   | 8/1                               | 0.130                      |                              |
| Size of main tumor, range, mm                                            | 27.0 (8.0–130.0)                        | 12.0 (10.0–120.0)                 | 0.050                      | 0.448                        |
| Number of tumors (2–3/ > 4), <i>n</i>                                    | 35/96                                   | 4/5                               | 0.251                      |                              |
| Relative tumor volume (< 50/ ≥ 50%), <i>n</i>                            | 123/8                                   | 9/0                               | 0.445                      |                              |
| Tumor morphology (SN type/non-SN type), <i>n</i>                         | 50/81                                   | 6/3                               | 0.091                      | 0.184                        |
| Serum AFP value, range, ng/mL                                            | 17.4 (1.4–84001.6)                      | 8.9 (0.9–1091.7)                  | 0.097                      | 0.446                        |
| Serum DCP value, range, mAU/mL                                           | 188 (13–93112)                          | 33 (18–20671)                     | 0.101                      |                              |
| Up to 7 criteria (in/out), <i>n</i>                                      | 43/88                                   | 5/4                               | 0.165                      |                              |
| History of systemic treatment (with/without), <i>n</i>                   | 22/109                                  | 0/9                               | 0.181                      |                              |
| Number of previous TACE procedure before lenvatinib (0–2/ < 3), <i>n</i> | 71/60                                   | 6/3                               | 0.467                      |                              |
| TACE-refractory or unsuitable (with/without), <i>n</i>                   | 125/6                                   | 8/1                               | 0.385                      |                              |

mALBI, modified albumin-bilirubin; SN, simple nodular; AFP, alpha-fetoprotein; DCP, des-γ-carboxy prothrombin; TACE, transarterial chemoembolization.
